# Supplementary material for: Silicon enhances suberization and lignification in roots of rice (Oryza sativa)
Source: PubMed Central journal article supplement — J Exp Bot. 2010 Dec 13;62(6):2001–11. doi: 10.1093/jxb/erq392 (PMC3060683; doi:10.1093/jxb/erq392), 2010-12-13
Supplement: supp_erq392_00053181-file001.pdf [file supp_erq392_00053181-file001.pdf]

# Silicon enhances suberization and lignification in roots of rice (*Oryza sativa*)

Alexander T Fleck, Thandar Nye, Cornelia Repenning, Frank Stahl, Marc Zahn, and Manfred K Schenk

## Supplementary Material

**Table S1:** Effect of silicic acid on relative quantity (RQ) of transcripts in root segment 0-2 cm distance from root tip as measured by microarray analysis. Stars represent significance: \* for  $p < 0.1$ , \*\* for  $p < 0.05$  and \*\*\* for  $p < 0.01$ . Genes not significantly regulated are not shown.

| Gene ID        | RQ +Si / -Si | Gene Annotation                             |
|----------------|--------------|---------------------------------------------|
| LOC_Os01g42410 | 1,4151**     | PDR5-like ABC transporter                   |
| LOC_Os01g67540 | -1,704**     | 4-coumarate-CoA ligase                      |
| LOC_Os05g20100 | 1,4422**     | glycerol-3-phosphate acyltransferase        |
| LOC_Os06g16350 | 2,4665**     | Class III peroxidase                        |
| LOC_Os06g39520 | -1,3866**    | myristoyl-acyl carrier protein thioesterase |
| LOC_Os07g44560 | -1,8572***   | 4-coumarate-CoA ligase                      |
| LOC_Os08g02110 | -1,3777**    | Class III peroxidase                        |
| LOC_Os10g01930 | 1,813***     | Acyltransferase                             |

**Table S2:** Effect of silicic acid on relative quantity (RQ) of transcripts in root segment 4-6 cm distance from root tip as measured by microarray analysis. Stars represent significance: \* for  $p < 0.1$ , \*\* for  $p < 0.05$  and \*\*\* for  $p < 0.01$ . Genes not significantly regulated are not shown.

| Gene ID        | RQ +Si / -Si | Gene Annotation                           |
|----------------|--------------|-------------------------------------------|
| LOC_Os01g22230 | -2,8029**    | Class III peroxidase                      |
| LOC_Os01g22560 | 2,1559**     | glycerol-3-phosphate acyltransferase      |
| LOC_Os01g24010 | 1,535**      | PDR5-like ABC transporter                 |
| LOC_Os01g42410 | 2,1958**     | PDR5-like ABC transporter                 |
| LOC_Os02g05630 | 2,4823**     | protein phosphatase 2C, regulator protein |
| LOC_Os02g06250 | -1,7841*     | phytosulfokine receptor                   |
| LOC_Os02g41680 | 1,9074**     | phenylalanine ammonia-lyase               |
| LOC_Os02g57760 | -2,2158**    | caffeic acid 3-O-methyltransferase        |
| LOC_Os04g59160 | 2,3224*      | Class III peroxidase                      |
| LOC_Os05g20100 | 2,1526***    | glycerol-3-phosphate acyltransferase      |
| LOC_Os06g22080 | 1,8152**     | diacylglycerol O-acyltransferase          |
| LOC_Os06g32990 | 2,9286**     | Class III peroxidase                      |
| LOC_Os08g03700 | 1,943***     | glycerol-3-phosphate acyltransferase      |
| LOC_Os09g23540 | 1,9898***    | dehydrogenase                             |
| LOC_Os09g32964 | -1,5739***   | Class III peroxidase                      |
| LOC_Os10g30610 | 2,057**      | ABC-2 type transporter family protein     |
| LOC_Os11g14050 | 1,8668***    | leucine-rich repeat (LRR) family protein  |
| LOC_Os12g25870 | 2,2423**     | caffeic acid O-methyltransferase (COMT)   |
| LOC_Os12g32814 | 1,9379**     | PDR-like ABC transporter                  |
